# Supplementary material for: Solvents regulate the packing porosity of a bilayer metal–organic cage
Source: Royal Society of Chemistry journal article supplement (doi:10.1039/d4dt01040j), 2024-01-01
Supplement: d4dt01040j1.pdf [file d4dt01040j1.pdf]

## Supporting Information

### **Solvents regulated packing porosity of a bilayer metal-organic cage**

Ting Pan,<sup>a</sup> Yanxin Wu,<sup>a</sup> Yuefeng Duan,<sup>a</sup> Jingui Duan<sup>\*a, b</sup>

<sup>a</sup> State Key Laboratory of Materials-Oriented Chemical Engineering,  
College of Chemical Engineering, Nanjing Tech University, Nanjing  
211816, China.

<sup>b</sup> State Key Laboratory of Chemistry and Utilization of Carbon Based  
Energy Resources, College of Chemistry, Xinjiang University, Urumqi,  
830017, China.

Email: [duanjingui@njtech.edu.cn](mailto:duanjingui@njtech.edu.cn)

## General procedures and materials

All the solvents and materials were purchased from chemical vendors and without further depuration before used. The instrument used for the  $^1\text{H-NMR}$  test was a Bruker Advance III 600 MHz nuclear magnetic resonance spectrometer. Powder X-Ray Diffraction (PXRD) pattern was tested with Rigaku SmartLab (test conditions: 40 kV, 40 mA,  $\text{CuK}\alpha$ ,  $\lambda = 1.5418 \text{ \AA}$ , scanning range 5-50°). Infrared (FT-IR) spectra were tested on the VECTOR 22 spectrometer using KBr tableting method in the range of 4000-400  $\text{cm}^{-1}$ . Thermogravimetric analysis (TGA) measurements were performed on a STA 209 F1 instrument under astatic  $\text{N}_2$  atmosphere with a heating rate of 10  $^\circ\text{C}/\text{min}$  at the range of 30-700  $^\circ\text{C}$ .

## Ligand synthesis

3,5-di(pyridin-3-yl)-4H-1,2,4-triazole was prepared according to previous literature.<sup>1-3</sup>

## Crystal analysis

Single-crystal X-ray diffraction data was collected by Rigaku XtaLAB Synergy diffractometer at room temperature using graphite monochromator  $\text{Mo K}\alpha$  radiation ( $\lambda = 0.71073 \text{ \AA}$ ). Data reduction was made with the Saint program. Empirical absorption correction using spherical harmonics, implemented in SCALE3 ABSPACK scaling algorithm. The structure was solved by direct methods and refined with full-matrix least-squares technique using the SHELXTL package.<sup>4</sup> Non-hydrogen atoms were refined with anisotropic displacement parameters during the final cycles. Organic hydrogen atoms were placed in calculated positions with isotropic displacement parameters set to  $1.2 \times U_{\text{eq}}$  of the attached atom. We have employed PLATON/SQUEEZE<sup>5, 6</sup> to calculate the diffraction contribution of the solvent molecules and, thereby, to produce a set of solvent-free diffraction intensities; structures were then refined again using the data generated.

## **Sample activation**

Prior to adsorption measurement, the samples were prepared by immersing the as-synthesized samples in dry acetone for three days to remove non-volatile solvents, and the extract was decanted every 8 h and replaced with fresh acetone. The completely activated sample was obtained by heating the solvent-exchanged sample at atmospheric temperature under a dynamic high vacuum for 24 h.

## **Single gas adsorption**

In the gas adsorption measurement, ultra-high-purity grade of CO<sub>2</sub>, C<sub>2</sub>H<sub>2</sub> and C<sub>2</sub>H<sub>4</sub>, gases were used throughout the adsorption experiments. Gas adsorption isotherms were collected using a Belsorp-mini volumetric adsorption instrument from BEL Japan Inc, using the volumetric technique.

## **Breakthrough Measurements.**

The breakthrough experiments were performed on the Beifang Gaorui CT-4 system. The initial activated samples were tightly packed into a stainless-steel column ( $\varphi = 0.30$  cm,  $L = 20$  cm). Then, the column was activated under vacuum at corresponding temperature and then swept with N<sub>2</sub> flow to remove impurities. Until no signal was detected, the gas flow was dosed into the column. Breakpoints were determined by gas chromatography. Between cycling experiments, re-generation can be achieved under vacuum at 323 K for half hour. Pressure of the feed gas is 1 bar.

## Structures.

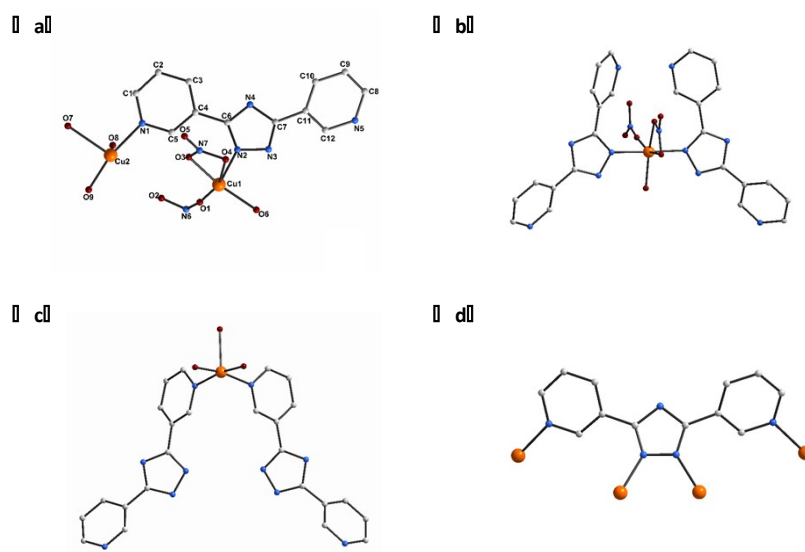

**Fig S1.** Structure of **NTU-93**: Asymmetric unit (a), Coordination configuration of Cu1 center (b), Coordination configuration of Cu2 center (c) and Ligand connection (d).

Color codes: C, grey; N, blue; O, dark red; Cu, orange.

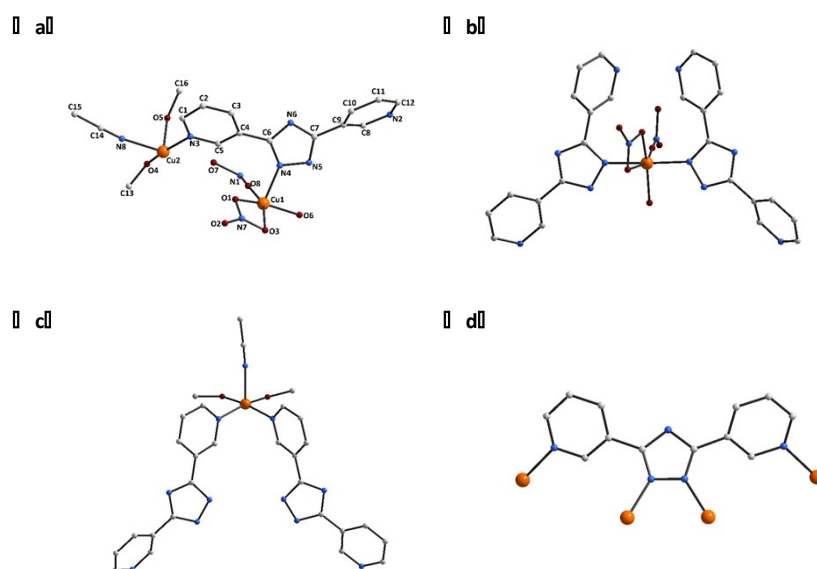

**Fig S2.** Structure of **NTU-94**: Asymmetric unit (a), Coordination configuration of Cu1 center (b), Coordination configuration of Cu2 center (c) and Ligand connection (d).

Color codes: C, grey; N, blue; O, dark red; Cu, orange.

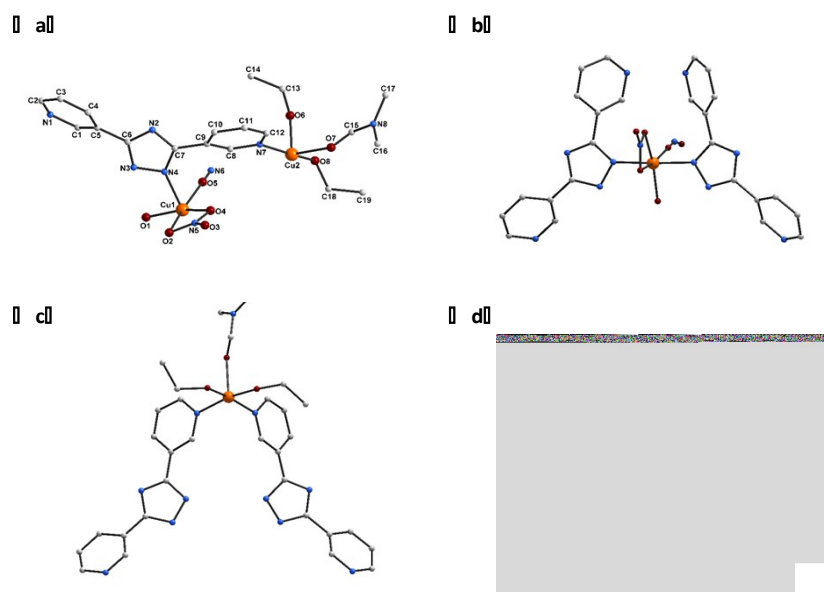

**Fig S3.** Structure of **NTU-95**: Asymmetric unit (a), Coordination configuration of Cu1 center (b), Coordination configuration of Cu2 center (c) and Ligand connection (d).

Color codes: C, grey; N, blue; O, dark red; Cu, orange.

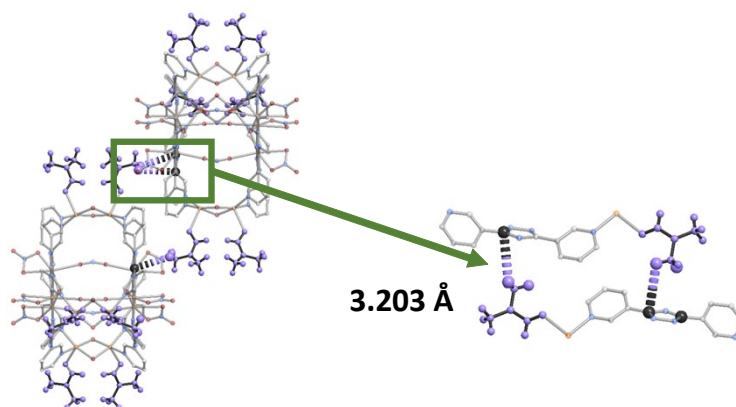

**Fig S4.** Weak hydrogen bonding connections in **NTU-95**.

## Characterizations.

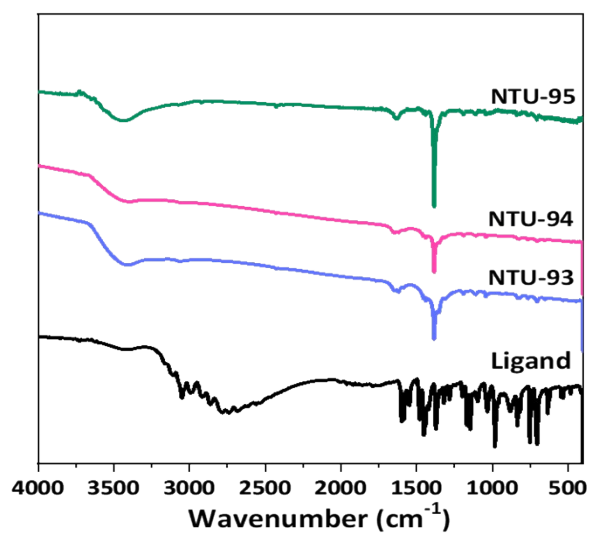

Fig S5. FT-IR spectra for the three MOCs and ligand.

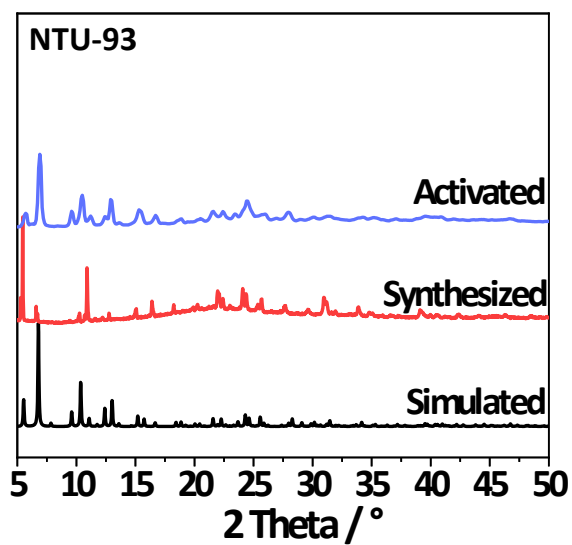

Fig S6. PXRD patterns of NTU-93.

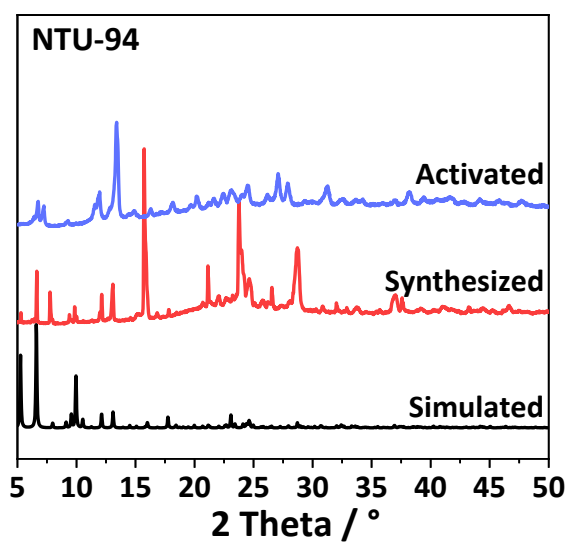

Fig S7. PXR D patterns of NTU-94.

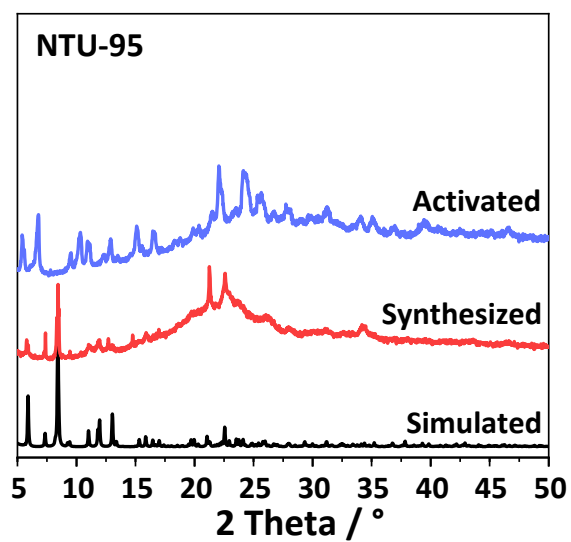

Fig S8. PXR D patterns of NTU-95.

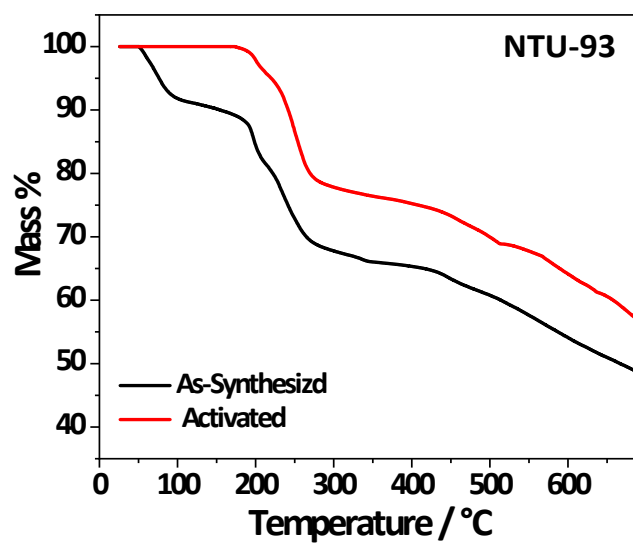

Fig S9. TG curves of as-synthesized and activated of NTU-93.

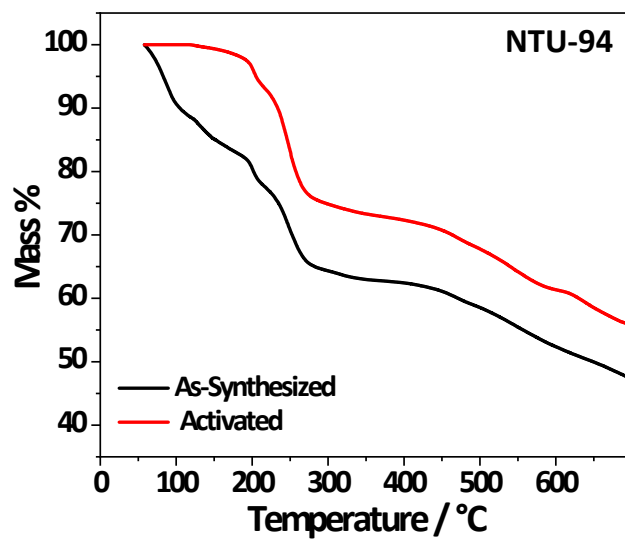

Fig S10. TG curves of as-synthesized and activated of NTU-94.



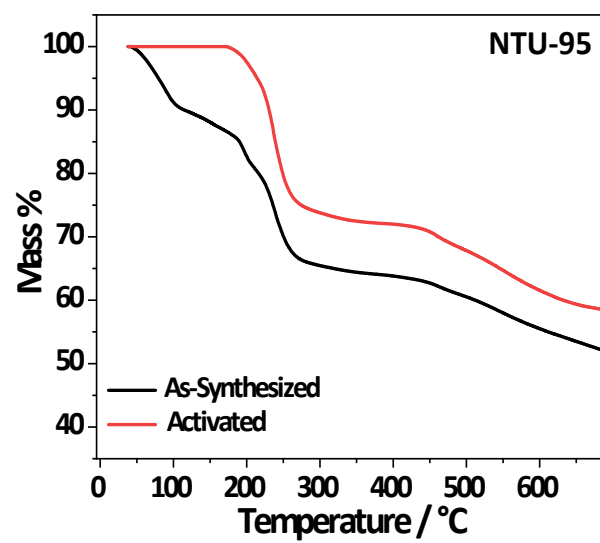

Fig S11. TG curves of as-synthesized and activated of NTU-95.

## Adsorption

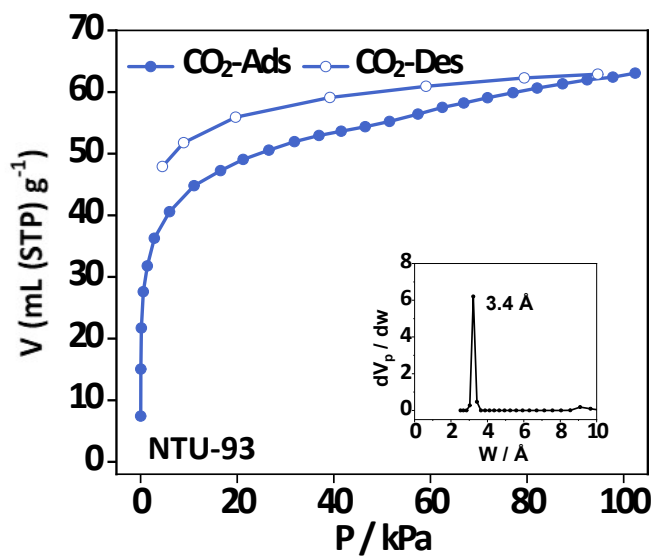

Fig S12. CO<sub>2</sub> adsorption at 195 K for NTU-93 and calculated pore size distribution.

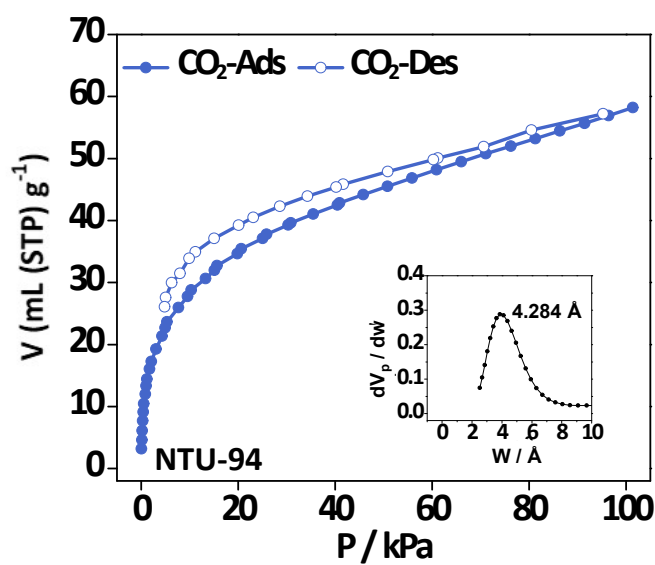

Fig S13. CO<sub>2</sub> adsorption at 195 K for NTU-94 and calculated pore size distribution.

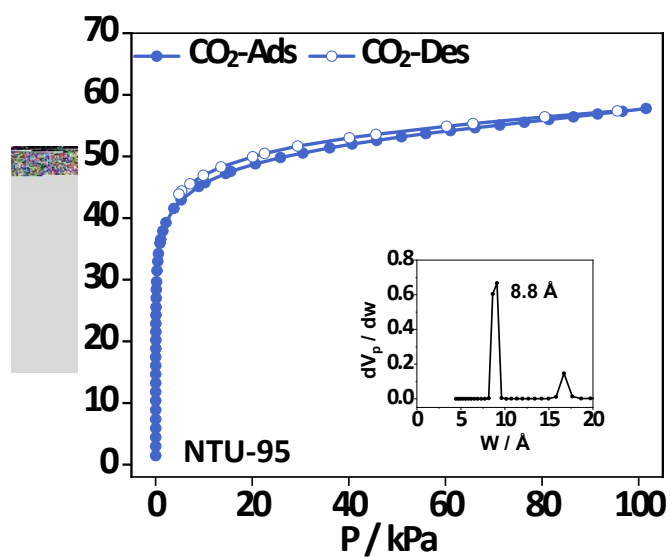

Fig S14. CO<sub>2</sub> adsorption at 195 K for NTU-95 and calculated pore size distribution.

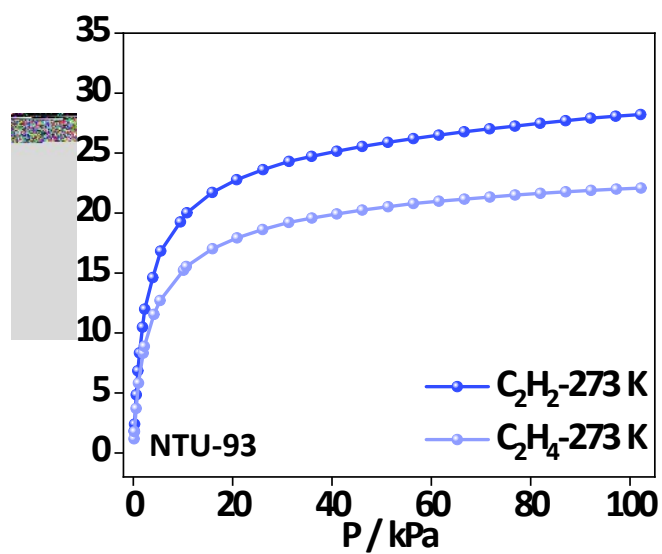

Fig S15. C<sub>2</sub>H<sub>2</sub> and C<sub>2</sub>H<sub>4</sub> gas adsorption isotherms of NTU-93 at 273 K.

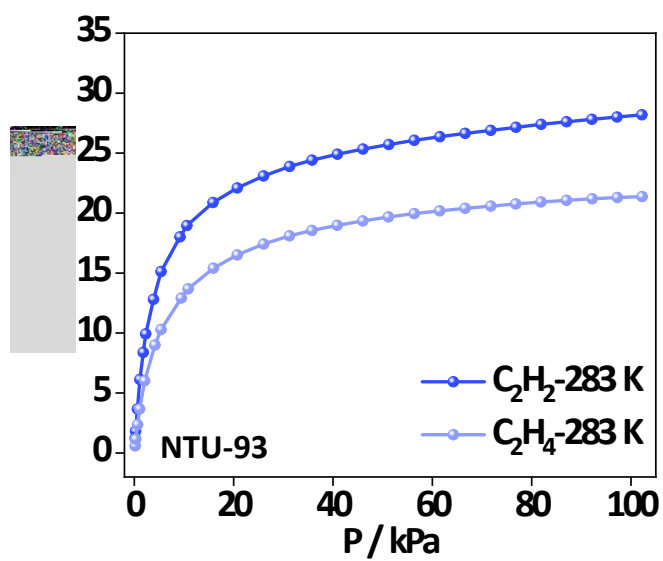

Fig S16. C<sub>2</sub>H<sub>2</sub> and C<sub>2</sub>H<sub>4</sub> gas adsorption isotherms of NTU-93 at 283 K.

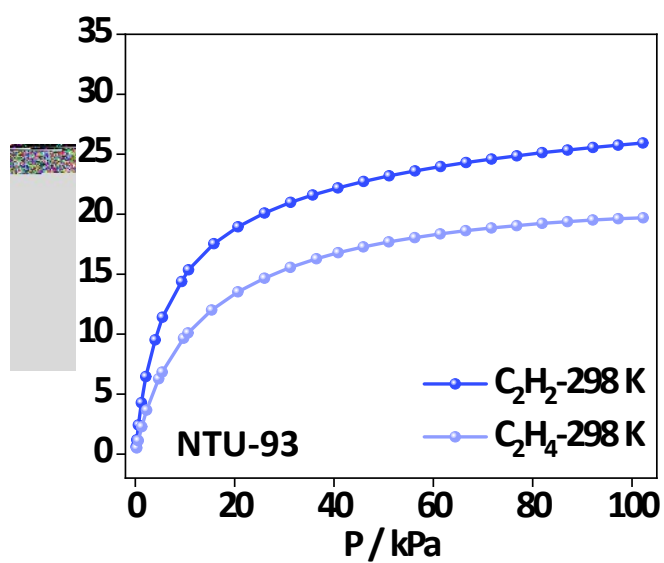

Fig S17. C<sub>2</sub>H<sub>2</sub> and C<sub>2</sub>H<sub>4</sub> gas adsorption isotherms of NTU-93 at 298 K.

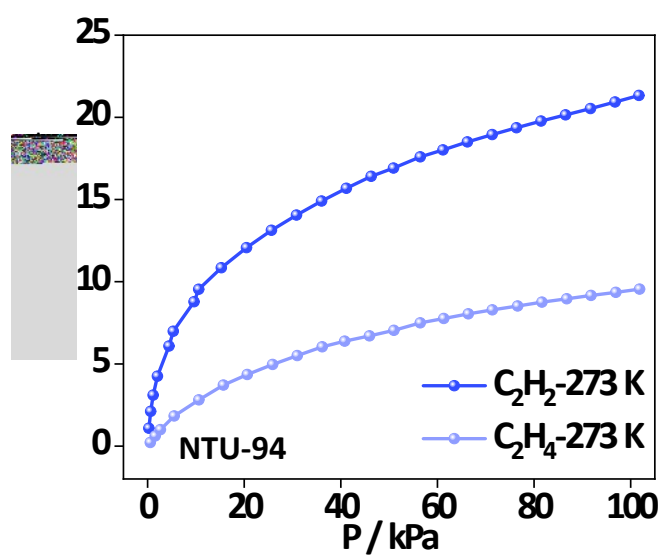

Fig S18. C<sub>2</sub>H<sub>2</sub> and C<sub>2</sub>H<sub>4</sub> gas adsorption isotherms of NTU-94 at 273 K

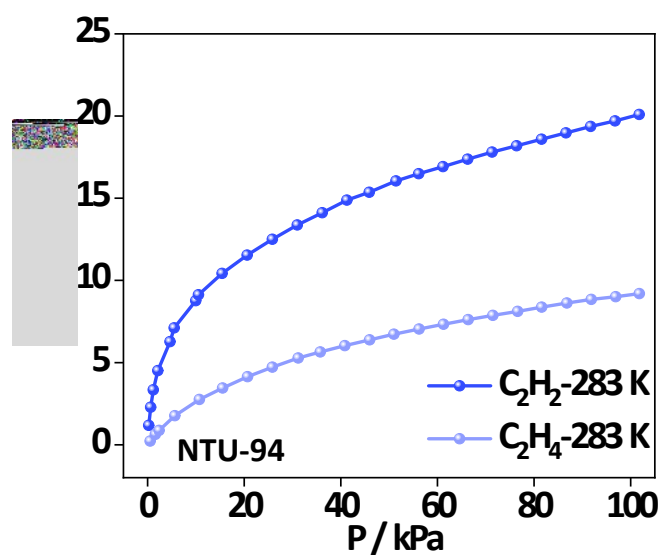

Fig S19. C<sub>2</sub>H<sub>2</sub> and C<sub>2</sub>H<sub>4</sub> gas adsorption isotherms of NTU-94 at 283 K.

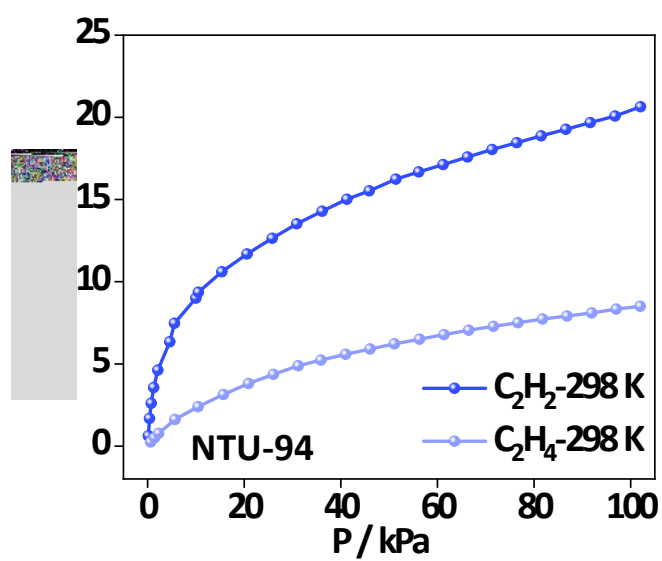

Fig S20.  $C_2H_2$  and  $C_2H_4$  gas adsorption isotherms of NTU-94 at 298 K.

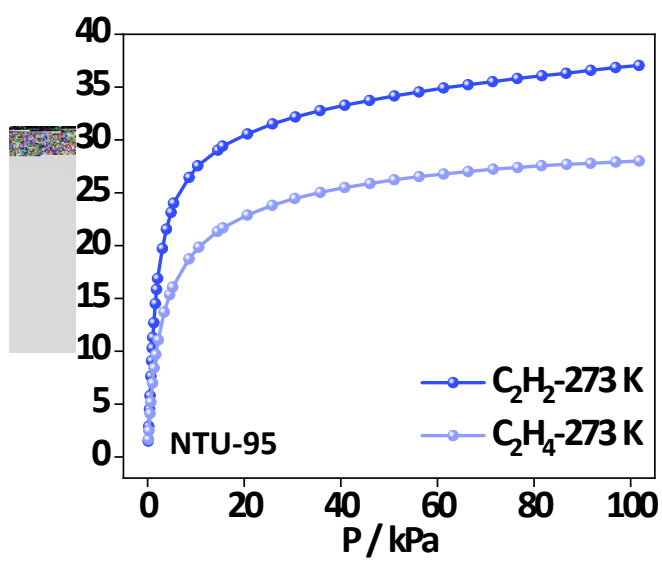

Fig S21.  $C_2H_2$  and  $C_2H_4$  gas adsorption isotherms of NTU-95 at 273 K.

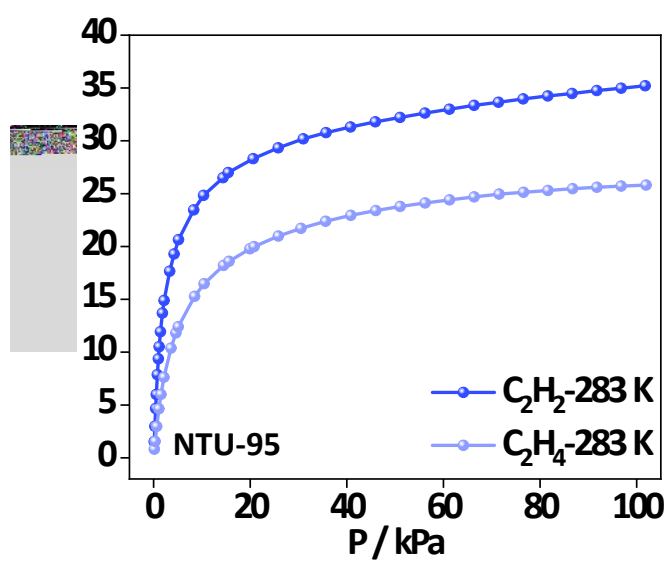

Fig S22. C<sub>2</sub>H<sub>2</sub> and C<sub>2</sub>H<sub>4</sub> gas adsorption isotherms of NTU-95 at 283 K.

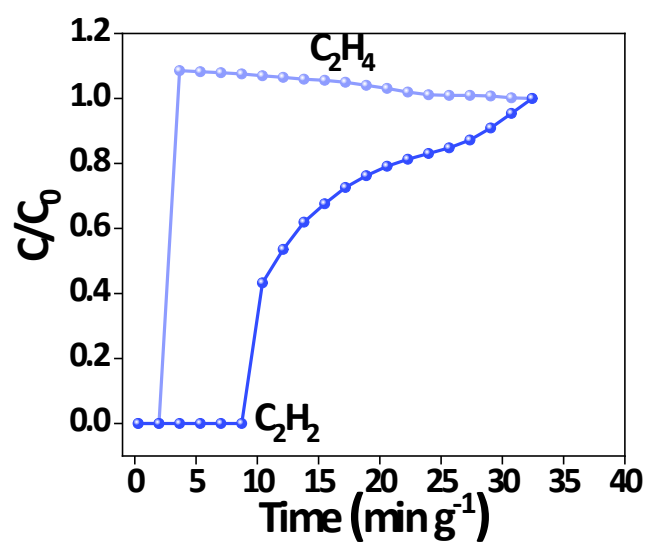

Fig S23. Compare of breakthrough curves of NTU-95 for a C<sub>2</sub>H<sub>2</sub>/C<sub>2</sub>H<sub>4</sub> mixture (1/99, v/v) at 298 K, 1 bar at 5 mL min<sup>-1</sup>

**Table S1** Crystal data and structure refinements for **NTU-93-series**.

| Compound                                            | NTU-93                                                                           | NTU-94                                                                            | NTU-95                                                                             |
|-----------------------------------------------------|----------------------------------------------------------------------------------|-----------------------------------------------------------------------------------|------------------------------------------------------------------------------------|
| Formula                                             | C <sub>72</sub> H <sub>67</sub> Cu <sub>12</sub> N <sub>39</sub> O <sub>61</sub> | C <sub>96</sub> H <sub>105</sub> Cu <sub>12</sub> N <sub>48</sub> O <sub>35</sub> | C <sub>102</sub> H <sub>120</sub> Cu <sub>12</sub> N <sub>45</sub> O <sub>41</sub> |
| Formula weight                                      | 3217.12                                                                          | 3253.75                                                                           | 3394.90                                                                            |
| Crystal system                                      | hexagonal                                                                        | hexagonal                                                                         | hexagonal                                                                          |
| Space group                                         | <i>P6<sub>3</sub>/m</i>                                                          | <i>P6<sub>3</sub>/m</i>                                                           | <i>P6<sub>3</sub>/m</i>                                                            |
| <i>a</i> (Å)                                        | 18.4268 (6)                                                                      | 19.3815 (10)                                                                      | 24.0593 (12)                                                                       |
| <i>b</i> (Å)                                        | 18.4268 (6)                                                                      | 19.3815 (10)                                                                      | 24.0593 (12)                                                                       |
| <i>c</i> (Å)                                        | 22.5112 (11)                                                                     | 22.130 (2)                                                                        | 21.519 (2)                                                                         |
| <i>V</i> (Å <sup>3</sup> )                          | 6619.6 (5)                                                                       | 7199.2 (11)                                                                       | 10787.5 (15)                                                                       |
| <i>Z</i>                                            | 2                                                                                | 2                                                                                 | 2                                                                                  |
| Density / g cm <sup>-3</sup>                        | 1.614                                                                            | 1.501                                                                             | 1.045                                                                              |
| Index ranges                                        | -21 ≤ <i>h</i> ≤ 15<br>-21 ≤ <i>k</i> ≤ 21<br>-26 ≤ <i>l</i> ≤ 24                | -23 ≤ <i>h</i> ≤ 23<br>-21 ≤ <i>k</i> ≤ 23<br>-26 ≤ <i>l</i> ≤ 26                 | -28 ≤ <i>h</i> ≤ 28<br>-28 ≤ <i>k</i> ≤ 27<br>-25 ≤ <i>l</i> ≤ 24                  |
| <i>R</i> <sub>1</sub>                               | 0.0715                                                                           | 0.0538                                                                            | 0.0765                                                                             |
| <i>wR</i> <sub>2</sub> [ <i>I</i> > 2σ( <i>I</i> )] | 0.2294                                                                           | 0.1663                                                                            | 0.2524                                                                             |
| F (000)                                             | 3216                                                                             | 3290                                                                              | 3446                                                                               |
| GOOF                                                | 1.02                                                                             | 1.03                                                                              | 1.02                                                                               |

$R_1 = \sum ||F_o| - |F_c|| / \sum |F_o|$ ;  $wR_2 = \sum [w(F_o^2 - F_c^2)^2] / \sum [w(F_o^2)^2]^{1/2}$  and  $w = 1 / [\sigma^2(F_o^2) + (0.1452P)^2]$  where  $P = (F_o^2 + 2F_c^2) / 3$ .



**Table S2** Formed hydrogen bonds in **NTU-93**, **NTU-94** and **NTU-95**.

| <b>NTU-93</b>   |         |           |              |
|-----------------|---------|-----------|--------------|
| D-H...A         | D-H (Å) | H...A (Å) | ∠D-H...A (°) |
| O7--H7A...O10   | 0.929   | 3.260     | 142.065      |
| O7--H7A...O12   | 0.929   | 3.247     | 125.582      |
| O7--H7B...C9    | 0.931   | 3.663     | 139.258      |
| <b>NTU-94</b>   |         |           |              |
| D-H...A         | D-H (Å) | H...A (Å) | ∠D-H...A (°) |
| C15--H15B...C10 | 0.960   | 2.861     | 152.437      |
| C15--H15C...O2  | 0.960   | 2.651     | 121.543      |
| <b>NTU-95</b>   |         |           |              |
| D-H...A         | D-H (Å) | H...A (Å) | ∠D-H...A (°) |
| C16--H16B...O6  | 0.960   | 2.605     | 161.033      |
| C16--H16B...N6  | 0.960   | 2.845     | 152.862      |
| C16--H16C...C7  | 0.959   | 3.203     | 116.745      |

## References

1. Q. Wei, C. Qiao, Z. Xia and S. Chen, *Synth Commun*, 2013, **43**, 3181-3191.
2. P. Howlader, P. Das, E. Zangrando and P. S. Mukherjee, *J. Am. Chem. Soc.*, 2016, **138**, 1668-1676.
3. J. Tang, Y. Shen, X. He, M. Chen, H. Zhao, Y. Wang, J. Jiang, P. Liu, R. Dang, M. Zhang, G. Qin, J. Bai and J. Duan, *Inorg. Chem.*, 2024, **63**, 3667-3674.
4. G. M. Sheldrick, *Acta Crystallogr. Sec. A*, 2008, **64**, 112-122.
5. P. Vandersluis and A. L. Spek, *Acta Crystallogr. Sec. A*, 1990, **46**, 194-201.
6. A. L. Spek, *J. Appl. Crystallogr.*, 2003, **36**, 7-13.
